# Supplementary material for: Smartphone-based point-of-care testing of salivary α-amylase for personal psychological measurement
Source: Royal Society of Chemistry journal article supplement (doi:10.1039/c5an01664a), 2015-01-01
Supplement: c5an01664a1.pdf [file c5an01664a1.pdf]

Supporting Information

Ms. No. AN-ART-08-2015-001664

September 16, 2015

**Smartphone-Based Point-of-Care Testing of Salivary  $\alpha$ -  
Amylase for Personal Psychological Measurement**

Lin Zhang, Wentao Yang, Yuankui Yang, Hong Liu\* and  
Zhongze Gu\*

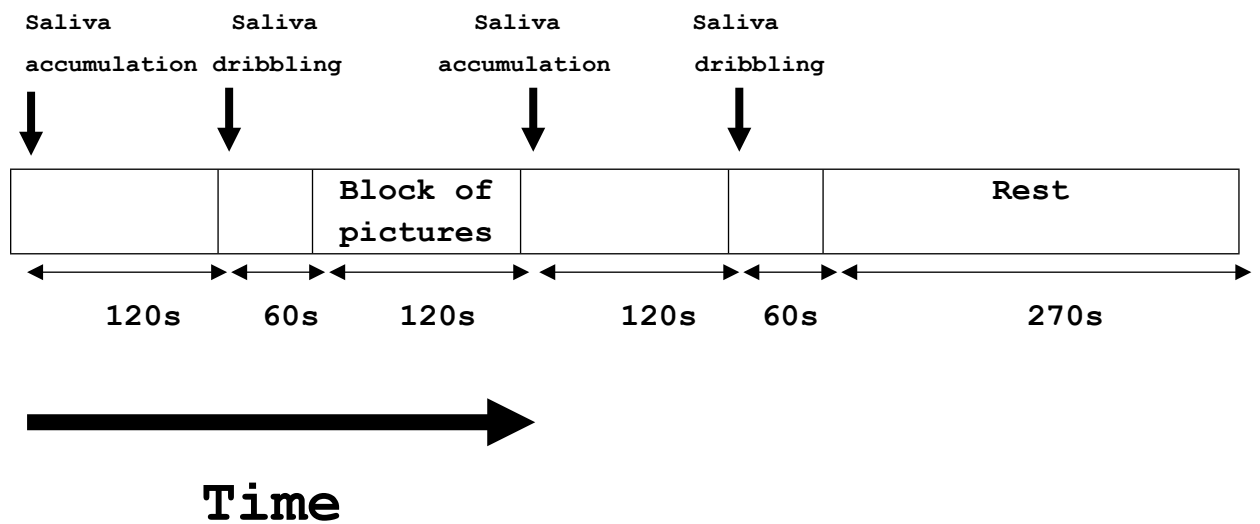

**Scheme S1.** Schematic illustration of the psychological measurement based on the sAA detection.

IAPS code is a four-digit number used to identify a certain picture in IAPS. For the pictures employed in the study, their IAPS code are:

Mutilation: 3030, 3051, 3060, 3064, 3071, 3080, 3100, 3130, 3150, 3400, 3550, 9405

Sport: 5621, 5626, 8030, 8161, 8162, 8170, 8180, 8185, 8370, 8400, 8490, 8496.

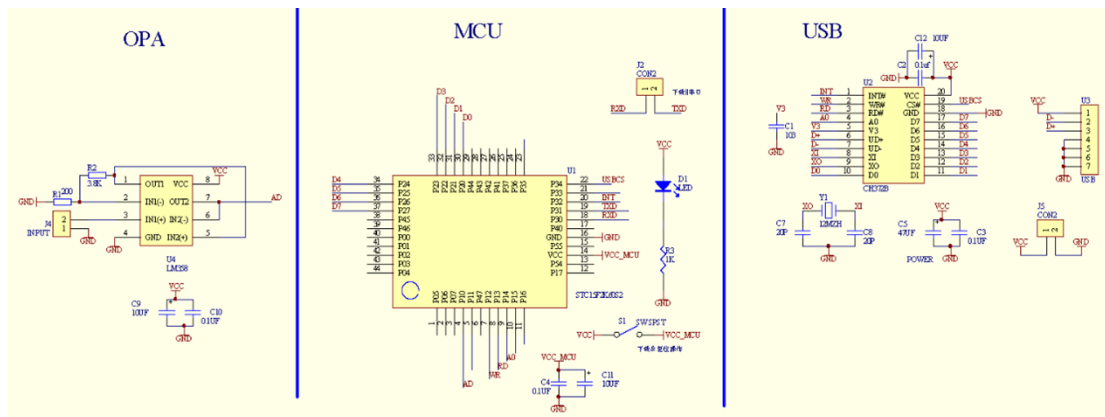

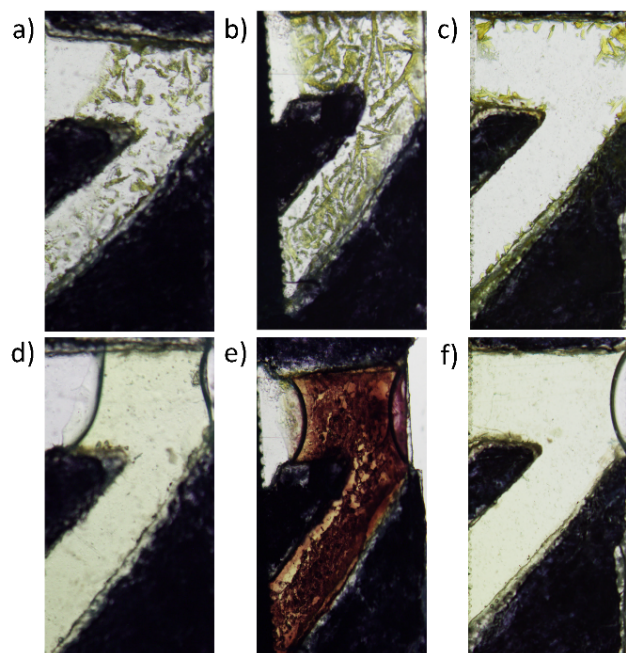

**Fig. S2.** Optical micrographs of the reaction zone showing the location of preloaded reagents (a-c) and re-dissolution (d-f). For a) and d), the preloaded reagents were starch, NaOH and  $\text{Fe}(\text{CN})_6^{3-}$ . Human saliva sample was introduced into the detection zone to dissolve these reagents. For b) and e), the preloaded reagents were starch, NaOH and  $\text{Fe}(\text{CN})_6^{3-}$ . Human saliva sample containing iodine was introduced to show the distribution of starch. For c) and f), the preloaded reagents were just NaOH and  $\text{Fe}(\text{CN})_6^{3-}$ . Human saliva sample was introduced into the detection zone to dissolve the reagents.

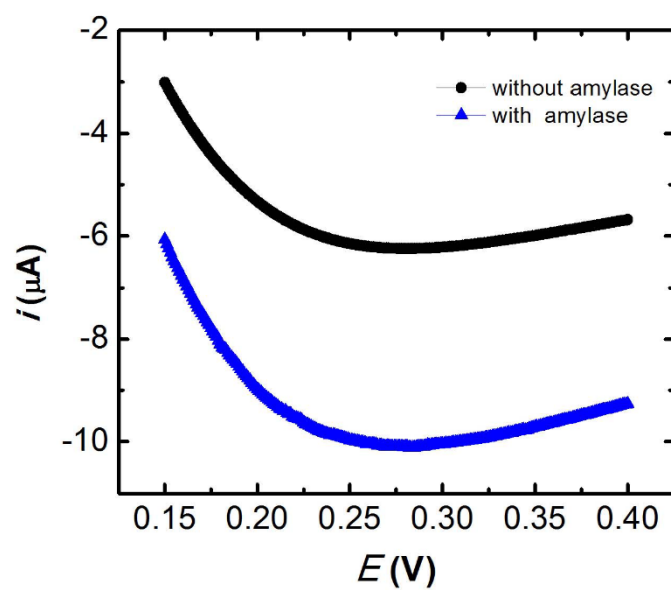

**Fig. S3.** Linear-sweep voltammogram obtained in a 0.010 M PBS solution (pH 7.4) containing 100 mM  $\text{Fe}(\text{CN})_6^{3-}$  and 100 mM NaOH. Temperature: 25 °C. 100  $\mu\text{L}$  aliquot of real saliva sample was freshly taken from a male subject, and added into the solution.
